# Supplementary material
Source: publisher figshare collection journal article supplement (https://acs.figshare.com/ndownloader/files/4661629)
Supplement: Supplementary file 1 [file 4661629]

## Supporting information

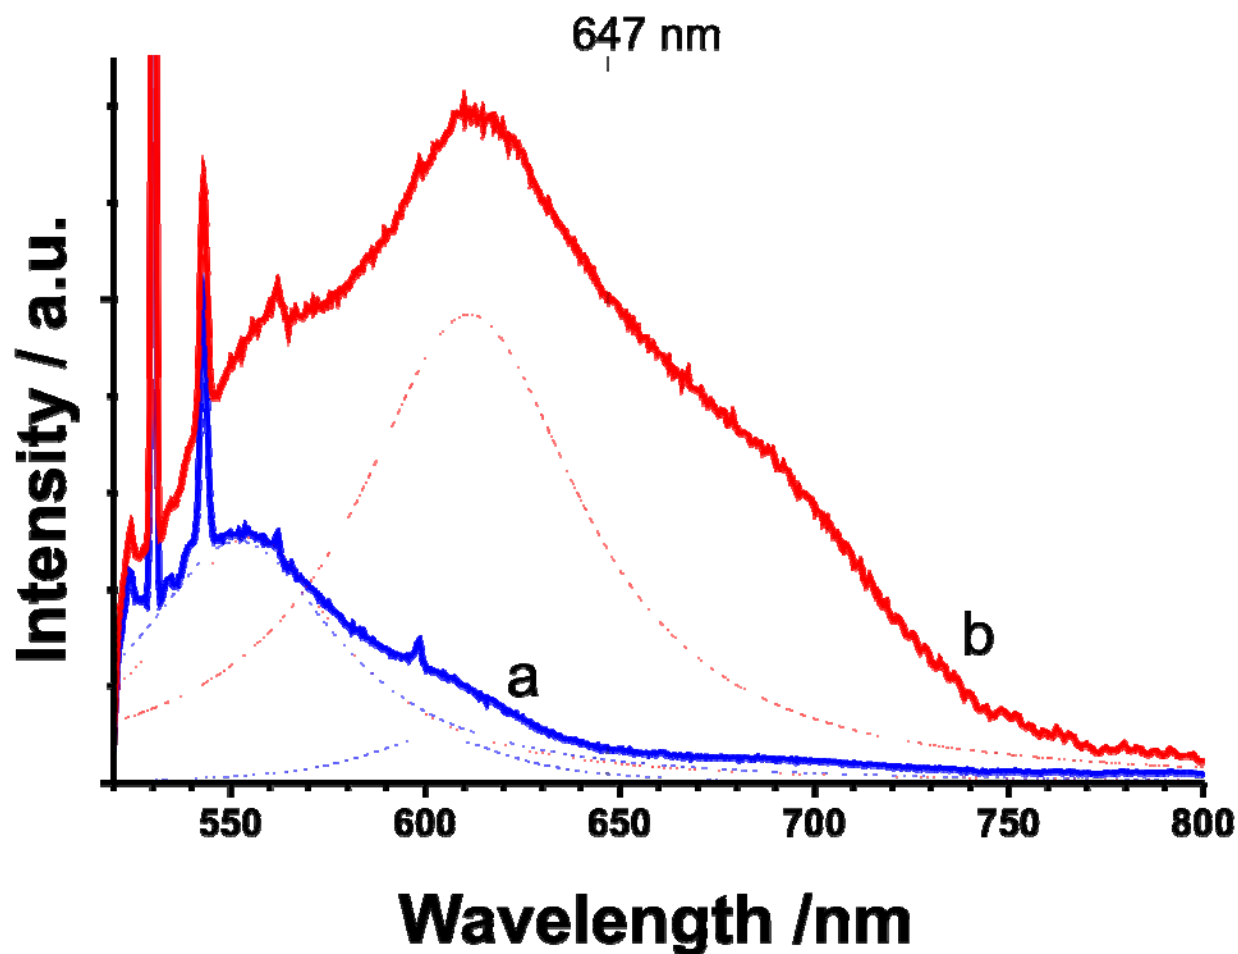

**Figure 1:** Fluorescence spectra obtained with  $\lambda_{\text{exc}}=514\text{nm}$  for the two gold nanoparticles of Figure 5 ( $a=35\text{nm}$  Au NP, position 2;  $b=70\text{nm}$  Au NP, position 3). The higher fluorescence of  $b$  at  $647\text{nm}$  is correlated with the higher NT's Raman enhancement as shown in Table 1 and derives from the red shift of the plasmon resonance for NPs of bigger size; on the other side, for the small NP the plasmon absorption at this wavelength is too weak and therefore both fluorescence and Raman enhancement are negligible.

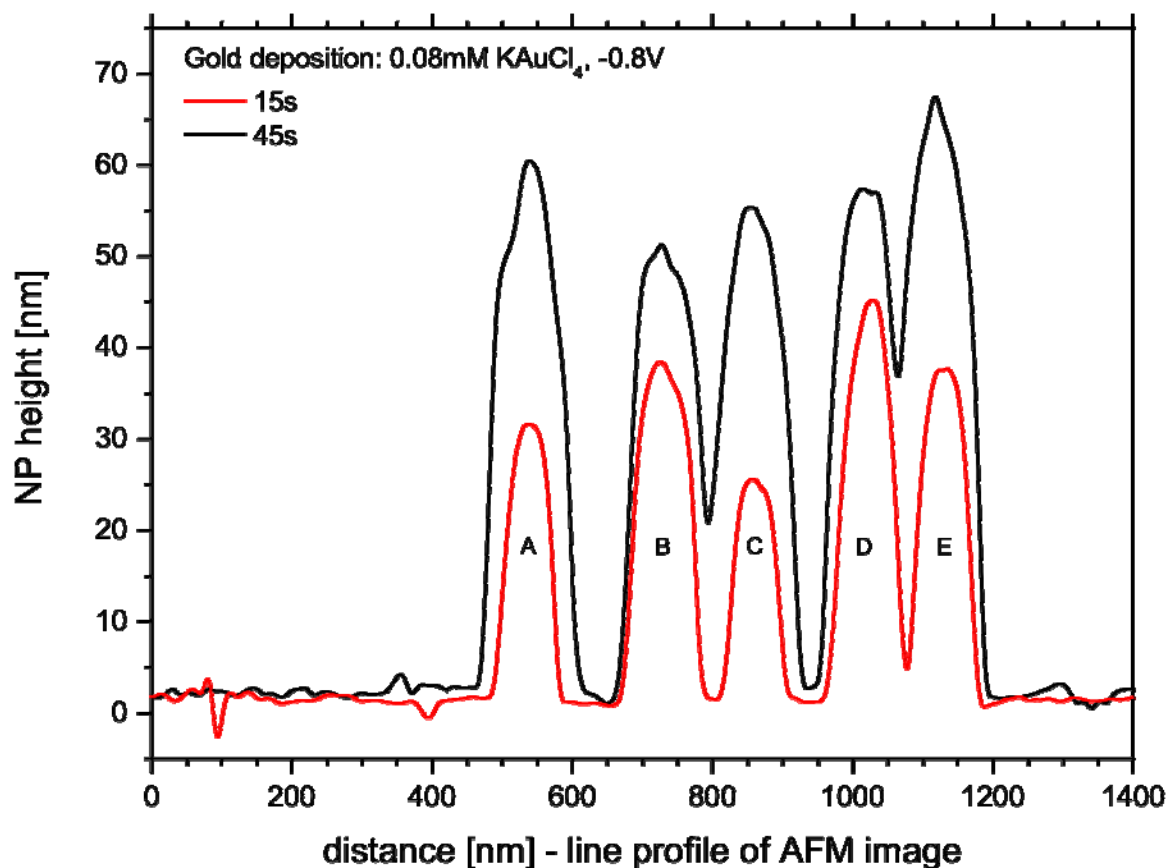

**Figure 2:** AFM height profile of five nearby nanoparticles (A-E) electrodeposited on a NT with a 0.08mM  $\text{KAuCl}_4$  solution. After 15s the NPs formed have an average size of ~30nm. After a second ECM run (45s total deposition time), the average particle size increased to ~55nm.
